# Supplementary material for: Nanoparticle-aggregated paddy-like copper dendritic nanostructures
Source: Royal Society of Chemistry journal article supplement (doi:10.1039/c0ce00257g), 2010-12-16
Supplement: c0ce00257g.pdf [file c0ce00257g.pdf]

## Electronic Supplementary Information

### Nanoparticle-Aggregated Paddy-Like Copper Dendritic Nanostructures

Shaodong Sun, Chuncai Kong, Liqun Wang, Shengchun Yang, Xiaoping Song, Bingjun Ding, and Zhimao Yang\*

*School of Science, MOE Key Laboratory for Non-Equilibrium Synthesis and Modulation of Condensed Matter,*

*State Key Laboratory for Mechanical Behavior of Materials, Xi'an Jiaotong University, Xi'an 710049, ShaanXi,*

*People's Republic of China*

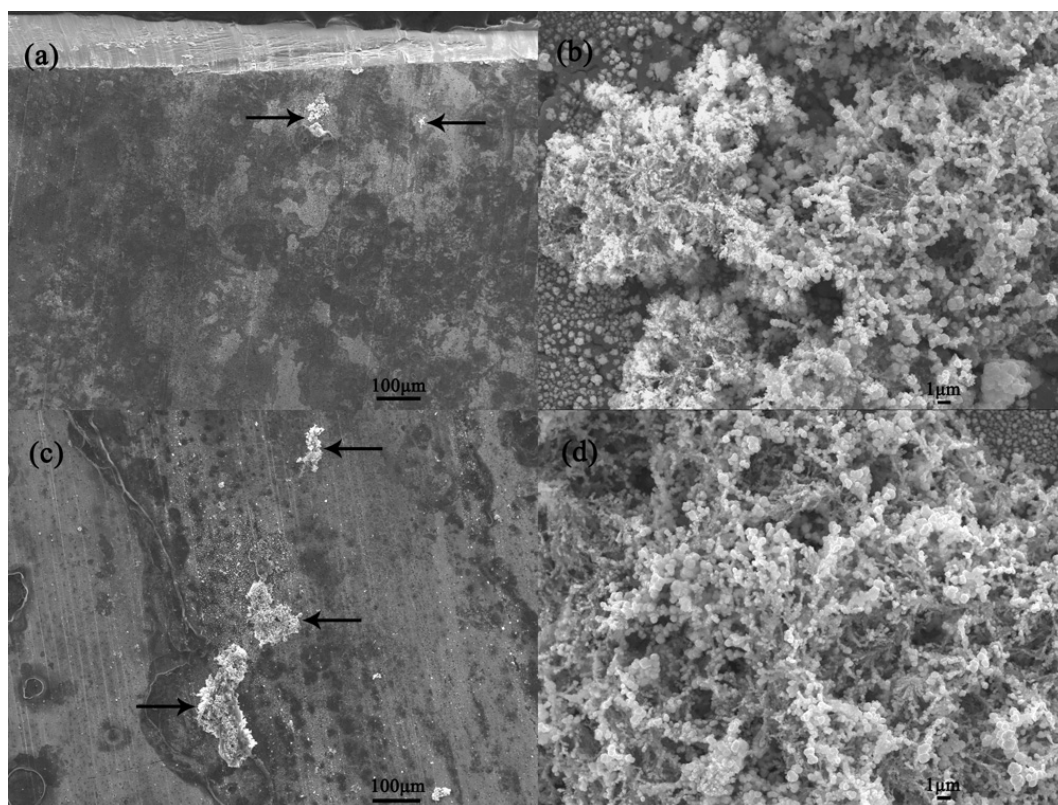

**Fig. S1** FE-SEM images with different magnifications of the products obtained in  $\text{CuCl}_2$  aqueous solution ( $\text{CuCl}_2$  0.007 g,  $\text{H}_2\text{O}$  2.0 mL) at different reaction time. (a) 60 s, low magnification; (b) 60 s, high magnification; (c) 120 s, low magnification; (d) 120 s, high magnification.
